# Supplementary material
Source: publisher figshare collection journal article supplement (https://sage.figshare.com/ndownloader/files/22294425)
Supplement: Supplementary file 1 [file 22294425]

# Technical Appendix to “A pragmatic randomized controlled trial of a cardiac hospital-to-home transitional care program in a Singapore academic medical center”

This technical appendix reports the results for the full specification of the regressions reported in Tables 3 and 4 of the main paper.

## Full Regression Specification for Main Results

Table A1: Effect of CareHub on Key Outcomes

| Independent variables            | Outcome variables                                |                                                    |                                      |                                        |                                               |                                    |
|----------------------------------|--------------------------------------------------|----------------------------------------------------|--------------------------------------|----------------------------------------|-----------------------------------------------|------------------------------------|
|                                  | (1)<br>No. of readmissions (cardiac & unplanned) | (2)<br>Total days readmitted (cardiac & unplanned) | (3)<br>No. of readmissions (cardiac) | (4)<br>Total days readmitted (cardiac) | (5)<br>Outpatient specialist visits (cardiac) | (6)<br>Emergency department visits |
| CareHub                          | -0.234**<br>(0.114)                              | -2.241**<br>(1.120)                                | -0.196<br>(0.119)                    | -2.017*<br>(1.184)                     | 0.328<br>(0.384)                              | -0.0702<br>(0.218)                 |
| Male                             | 0.152<br>(0.119)                                 | -0.538<br>(1.071)                                  | 0.128<br>(0.123)                     | -0.304<br>(1.116)                      | 0.605<br>(0.372)                              | 0.357*<br>(0.209)                  |
| Age                              | -0.00273<br>(0.0265)                             | -0.127<br>(0.389)                                  | -0.00399<br>(0.0296)                 | -0.0497<br>(0.399)                     | -0.201<br>(0.243)                             | 0.0205<br>(0.0608)                 |
| Age-squared                      | 4.51e-05<br>(0.000204)                           | 0.000986<br>(0.00311)                              | 4.05e-05<br>(0.000222)               | 0.000313<br>(0.00318)                  | 0.00137<br>(0.00170)                          | -0.000133<br>(0.000435)            |
| Ethnicity:<br>Malay              | 0.0160<br>(0.149)                                | -1.612<br>(1.416)                                  | 0.0464<br>(0.160)                    | -2.000<br>(1.462)                      | 0.0944<br>(0.468)                             | 0.369<br>(0.298)                   |
| Ethnicity:<br>Indian             | 0.136<br>(0.259)                                 | -0.863<br>(1.264)                                  | 0.109<br>(0.260)                     | -0.414<br>(1.603)                      | -0.574<br>(0.599)                             | 0.528<br>(0.641)                   |
| Ethnicity:<br>Others             | 0.0687<br>(0.218)                                | 1.660<br>(2.928)                                   | 0.0298<br>(0.222)                    | 1.235<br>(2.959)                       | -0.611<br>(0.549)                             | 0.0899<br>(0.321)                  |
| Marital status:<br>Married       | 0.161<br>(0.237)                                 | 2.341*<br>(1.348)                                  | 0.121<br>(0.256)                     | 2.494*<br>(1.460)                      | 1.580**<br>(0.749)                            | -0.0620<br>(0.629)                 |
| Marital status:<br>Missing value | 0.0526<br>(0.241)                                | 1.853<br>(1.583)                                   | -0.00501<br>(0.265)                  | 2.255<br>(1.740)                       | 1.152<br>(0.796)                              | -0.361<br>(0.585)                  |
| Ward C                           | 0.0713                                           | 0.329                                              | 0.0639                               | -0.117                                 | -0.374                                        | 0.167                              |

|                                                     |                    |                   |                   |                   |                     |                    |
|-----------------------------------------------------|--------------------|-------------------|-------------------|-------------------|---------------------|--------------------|
|                                                     | (0.119)            | (1.262)           | (0.128)           | (1.371)           | (0.413)             | (0.260)            |
| Index adm in<br>Aug 2016                            | -0.818<br>(0.748)  | -2.224<br>(2.811) | -0.981<br>(0.754) | -4.348<br>(3.861) | -1.086<br>(0.936)   | -2.256<br>(2.102)  |
| Index adm in<br>Sep 2016                            | -0.920<br>(0.721)  | -3.455<br>(2.750) | -1.040<br>(0.731) | -5.520<br>(3.847) | -1.638<br>(0.997)   | -2.060<br>(2.027)  |
| Index adm in<br>Oct 2016                            | -0.765<br>(0.716)  | -1.810<br>(2.976) | -0.881<br>(0.726) | -3.301<br>(4.052) | -1.134<br>(1.012)   | -2.381<br>(2.014)  |
| Index adm in<br>Nov 2016                            | -0.869<br>(0.708)  | -1.295<br>(2.903) | -0.978<br>(0.718) | -2.551<br>(4.019) | -1.305<br>(0.940)   | -2.203<br>(1.985)  |
| Index adm in<br>Dec 2016 <sup>4</sup>               | -0.825<br>(0.729)  | -3.507<br>(2.934) | -0.981<br>(0.738) | -5.491<br>(3.966) | -2.092**<br>(0.969) | -2.230<br>(2.024)  |
| Previous<br>myocardial<br>infarction                | 0.174*<br>(0.105)  | 1.827<br>(1.108)  | 0.163<br>(0.112)  | 2.015*<br>(1.199) | -0.371<br>(0.395)   | 0.242<br>(0.192)   |
| Cerebrovascular<br>/ peripheral<br>vascular disease | 0.216<br>(0.160)   | 1.926<br>(1.338)  | 0.237<br>(0.164)  | 1.609<br>(1.367)  | -0.751*<br>(0.414)  | 0.547<br>(0.392)   |
| Diabetes                                            | 0.201*<br>(0.107)  | 1.407<br>(0.990)  | 0.205*<br>(0.112) | 1.148<br>(1.112)  | -0.268<br>(0.413)   | 0.232<br>(0.224)   |
| Congestive<br>heart failure                         | 0.117<br>(0.125)   | 1.548<br>(1.072)  | 0.0893<br>(0.129) | 1.487<br>(1.135)  | 0.579<br>(0.413)    | -0.182<br>(0.262)  |
| Chronic<br>pulmonary<br>disease                     | 0.316**<br>(0.150) | 1.911<br>(1.551)  | 0.305*<br>(0.157) | 1.788<br>(1.589)  | -0.636*<br>(0.347)  | 0.142<br>(0.288)   |
| Liver or renal<br>failure                           | -0.0763<br>(0.133) | 0.854<br>(1.409)  | -0.108<br>(0.137) | 0.417<br>(1.465)  | -0.479<br>(0.381)   | -0.351<br>(0.285)  |
| Connective<br>tissue disease                        | -0.0727<br>(0.213) | -1.367<br>(2.330) | -0.114<br>(0.225) | -1.786<br>(2.483) | -0.186<br>(0.602)   | -0.0133<br>(0.351) |
| Other diseases <sup>5</sup>                         | 0.165<br>(0.137)   | 0.499<br>(0.915)  | 0.143<br>(0.143)  | 0.542<br>(1.001)  | -0.738<br>(0.451)   | 0.380<br>(0.297)   |
| No. of pre-<br>index inpatient<br>visits            | 0.205<br>(0.160)   | 0.339<br>(1.157)  | 0.234<br>(0.165)  | 0.289<br>(1.172)  | 0.210<br>(0.315)    | 0.349<br>(0.403)   |
| No. of pre-<br>index inpatient<br>days              | 0.00939            | 0.295             | 0.00598           | 0.290             | 0.000450            | 0.00145            |

|                                               |                     |                   |                     |                    |                      |                     |
|-----------------------------------------------|---------------------|-------------------|---------------------|--------------------|----------------------|---------------------|
|                                               | (0.0159)            | (0.270)           | (0.0165)            | (0.273)            | (0.0277)             | (0.0265)            |
| No. of pre-index outpatient specialist visits | -0.0264<br>(0.0188) | -0.119<br>(0.149) | -0.0226<br>(0.0191) | -0.0876<br>(0.153) | 0.141***<br>(0.0528) | -0.0378<br>(0.0472) |
| No. of pre-index emergency department visits  | -0.0586<br>(0.0917) | -0.555<br>(0.799) | -0.0834<br>(0.0956) | -0.578<br>(0.805)  | -0.351<br>(0.214)    | 0.366**<br>(0.180)  |
| Observations                                  | 270                 | 270               | 270                 | 270                | 270                  | 270                 |
| R-squared                                     | 0.229               | 0.198             | 0.210               | 0.171              | 0.156                | 0.392               |

---

Notes:

<sup>1</sup> Heteroskedasticity-robust standard errors in parentheses. \*\*\* p<0.01, \*\* p<0.05, \* p<0.1

<sup>2</sup> Estimates of the effect of CareHub are from a regression model that includes controls for demographics, co-morbidities, and healthcare utilization in the 6 months before the index visit.

<sup>3</sup> For the outcome variables “total days readmitted” in columns (2) and (4), patients without any readmissions are assigned a value of 0. These outcome variables thus capture effects due to reduced readmissions as well as reduced length of stay for patients who are readmitted.

<sup>4</sup> Admission dates were shifted to mask confidential information. Therefore, our data includes admissions dated in December 2016, even though the last patient for our study was recruited in November 2016.

<sup>5</sup> Other diseases include AIDS, cancer, and dementia.

## Full Regression Specification for Heterogeneity Analyses

Table A2.1: Heterogeneity Analyses by total days spent in hospital before index visit

| Independent variables              | Outcome variables                                         |                                                             |                                            |                                              |
|------------------------------------|-----------------------------------------------------------|-------------------------------------------------------------|--------------------------------------------|----------------------------------------------|
|                                    | (1)<br>No. of<br>readmissions<br>(cardiac &<br>unplanned) | (2)<br>Total days<br>readmitted<br>(cardiac &<br>unplanned) | (3)<br>No. of<br>readmissions<br>(cardiac) | (4)<br>Total days<br>readmitted<br>(cardiac) |
| CareHub                            | 0.0383<br>(0.116)                                         | 0.802<br>(1.426)                                            | 0.0729<br>(0.123)                          | 0.992<br>(1.515)                             |
| CareHub × total days               | -0.0560***<br>(0.0190)                                    | -0.625<br>(0.393)                                           | -0.0553***<br>(0.0195)                     | -0.618<br>(0.399)                            |
| Male                               | 0.175<br>(0.120)                                          | -0.282<br>(1.065)                                           | 0.151<br>(0.124)                           | -0.0504<br>(1.105)                           |
| Age                                | -0.00228<br>(0.0240)                                      | -0.122<br>(0.366)                                           | -0.00355<br>(0.0273)                       | -0.0448<br>(0.376)                           |
| Age-squared                        | 4.41e-05<br>(0.000186)                                    | 0.000974<br>(0.00292)                                       | 3.94e-05<br>(0.000205)                     | 0.000301<br>(0.00299)                        |
| Ethnicity: Malay                   | -0.0271<br>(0.141)                                        | -2.094<br>(1.442)                                           | 0.00379<br>(0.155)                         | -2.476<br>(1.502)                            |
| Ethnicity: Indian                  | 0.0699<br>(0.256)                                         | -1.596<br>(1.448)                                           | 0.0445<br>(0.259)                          | -1.138<br>(1.830)                            |
| Ethnicity: Others                  | -0.0291<br>(0.156)                                        | 0.568<br>(1.949)                                            | -0.0668<br>(0.161)                         | 0.156<br>(1.973)                             |
| Marital status: Married            | 0.170<br>(0.228)                                          | 2.451*<br>(1.355)                                           | 0.131<br>(0.247)                           | 2.603*<br>(1.458)                            |
| Marital status: Missing value      | 0.0597<br>(0.230)                                         | 1.932<br>(1.604)                                            | 0.00198<br>(0.253)                         | 2.333<br>(1.746)                             |
| Ward C                             | -0.0206<br>(0.110)                                        | -0.698<br>(0.991)                                           | -0.0269<br>(0.121)                         | -1.132<br>(1.120)                            |
| Index adm in Aug 2016              | -0.636<br>(0.735)                                         | -0.194<br>(3.277)                                           | -0.801<br>(0.743)                          | -2.341<br>(4.211)                            |
| Index adm in Sep 2016              | -0.744<br>(0.710)                                         | -1.487<br>(3.122)                                           | -0.866<br>(0.721)                          | -3.574<br>(4.116)                            |
| Index adm in Oct 2016              | -0.680<br>(0.709)                                         | -0.858<br>(3.300)                                           | -0.797<br>(0.719)                          | -2.358<br>(4.294)                            |
| Index adm in Nov 2016              | -0.806<br>(0.704)                                         | -0.589<br>(3.190)                                           | -0.916<br>(0.714)                          | -1.853<br>(4.227)                            |
| Index adm in Dec 2016 <sup>4</sup> | -0.770<br>(0.727)                                         | -2.893<br>(3.296)                                           | -0.926<br>(0.737)                          | -4.884<br>(4.230)                            |
| Previous myocardial<br>infarction  | 0.121                                                     | 1.238                                                       | 0.111                                      | 1.433                                        |

|                                               |                      |                   |                     |                   |
|-----------------------------------------------|----------------------|-------------------|---------------------|-------------------|
|                                               | (0.0994)             | (0.893)           | (0.107)             | (1.000)           |
| Cerebrovascular / peripheral vascular disease | 0.199<br>(0.153)     | 1.739<br>(1.177)  | 0.220<br>(0.158)    | 1.424<br>(1.217)  |
| Diabetes                                      | 0.193*<br>(0.108)    | 1.317<br>(1.019)  | 0.197*<br>(0.114)   | 1.059<br>(1.147)  |
| Congestive heart failure                      | 0.117<br>(0.123)     | 1.549<br>(1.039)  | 0.0894<br>(0.127)   | 1.488<br>(1.098)  |
| Chronic pulmonary disease                     | 0.227<br>(0.139)     | 0.916<br>(1.133)  | 0.217<br>(0.145)    | 0.804<br>(1.159)  |
| Liver or renal failure                        | -0.0453<br>(0.129)   | 1.201<br>(1.416)  | -0.0775<br>(0.133)  | 0.760<br>(1.474)  |
| Connective tissue disease                     | -0.0884<br>(0.205)   | -1.543<br>(2.347) | -0.129<br>(0.218)   | -1.959<br>(2.487) |
| Other diseases <sup>5</sup>                   | 0.166<br>(0.128)     | 0.505<br>(1.066)  | 0.144<br>(0.134)    | 0.548<br>(1.113)  |
| No. of pre-index inpatient visits             | 0.165<br>(0.152)     | -0.105<br>(1.360) | 0.195<br>(0.157)    | -0.150<br>(1.376) |
| No. of pre-index inpatient days               | 0.0464**<br>(0.0215) | 0.709<br>(0.474)  | 0.0425*<br>(0.0223) | 0.698<br>(0.482)  |
| No. of pre-index outpatient specialist visits | -0.0299<br>(0.0190)  | -0.159<br>(0.163) | -0.0261<br>(0.0193) | -0.127<br>(0.166) |
| No. of pre-index emergency department visits  | -0.00119<br>(0.0746) | 0.0859<br>(0.660) | -0.0267<br>(0.0784) | 0.0558<br>(0.674) |
| Observations                                  | 270                  | 270               | 270                 | 270               |
| R-squared                                     | 0.298                | 0.299             | 0.274               | 0.262             |

Notes:

<sup>1</sup> Heteroskedasticity-robust standard errors in parentheses. \*\*\* p<0.01, \*\* p<0.05, \* p<0.1

<sup>2</sup> Estimates of the effect of CareHub are from a regression model that includes controls for demographics, co-morbidities, and healthcare utilization in the 6 months before the index visit.

<sup>3</sup> For the outcome variables “total days readmitted” in columns (2) and (4), patients without any readmissions are assigned a value of 0. These outcome variables thus capture effects due to reduced readmissions as well as reduced length of stay for patients who are readmitted.

<sup>4</sup> Admission dates were shifted to mask confidential information. Therefore, our data includes admissions dated in December 2016, even though the last patient for our study was recruited in November 2016.

<sup>5</sup> Other diseases include AIDS, cancer, and dementia.

Table A2.2: Heterogeneity analyses by ward class

| Independent variables                            | Outcome variables                                         |                                                             |                                            |                                              |
|--------------------------------------------------|-----------------------------------------------------------|-------------------------------------------------------------|--------------------------------------------|----------------------------------------------|
|                                                  | (1)<br>No. of<br>readmissions<br>(cardiac &<br>unplanned) | (2)<br>Total days<br>readmitted<br>(cardiac &<br>unplanned) | (3)<br>No. of<br>readmissions<br>(cardiac) | (4)<br>Total days<br>readmitted<br>(cardiac) |
| CareHub                                          | 0.116<br>(0.162)                                          | -1.024<br>(1.611)                                           | 0.208<br>(0.182)                           | -0.813<br>(1.929)                            |
| CareHub × ward C                                 | -0.545**<br>(0.227)                                       | -1.897<br>(1.674)                                           | -0.631***<br>(0.241)                       | -1.878<br>(2.017)                            |
| Male                                             | 0.0997<br>(0.115)                                         | -0.719<br>(1.055)                                           | 0.0682<br>(0.120)                          | -0.483<br>(1.098)                            |
| Age                                              | -0.00807<br>(0.0270)                                      | -0.146<br>(0.389)                                           | -0.0102<br>(0.0299)                        | -0.0681<br>(0.399)                           |
| Age-squared                                      | 7.87e-05<br>(0.000209)                                    | 0.00110<br>(0.00312)                                        | 7.93e-05<br>(0.000226)                     | 0.000429<br>(0.00318)                        |
| Ethnicity: Malay                                 | -0.0125<br>(0.145)                                        | -1.711<br>(1.411)                                           | 0.0134<br>(0.156)                          | -2.098<br>(1.460)                            |
| Ethnicity: Indian                                | 0.108<br>(0.251)                                          | -0.960<br>(1.234)                                           | 0.0772<br>(0.253)                          | -0.509<br>(1.620)                            |
| Ethnicity: Others                                | 0.0377<br>(0.212)                                         | 1.552<br>(2.939)                                            | -0.00600<br>(0.217)                        | 1.129<br>(2.971)                             |
| Marital status: Married                          | 0.199<br>(0.241)                                          | 2.474*<br>(1.335)                                           | 0.166<br>(0.257)                           | 2.626*<br>(1.439)                            |
| Marital status: Missing value                    | 0.0939<br>(0.246)                                         | 1.996<br>(1.578)                                            | 0.0427<br>(0.266)                          | 2.397<br>(1.716)                             |
| Ward C                                           | 0.351*<br>(0.184)                                         | 1.302<br>(1.615)                                            | 0.387**<br>(0.184)                         | 0.846<br>(1.738)                             |
| Index adm in Aug 2016                            | -0.810<br>(0.731)                                         | -2.195<br>(2.739)                                           | -0.971<br>(0.731)                          | -4.319<br>(3.777)                            |
| Index adm in Sep 2016                            | -0.900<br>(0.702)                                         | -3.386<br>(2.677)                                           | -1.017<br>(0.706)                          | -5.452<br>(3.756)                            |
| Index adm in Oct 2016                            | -0.775<br>(0.703)                                         | -1.844<br>(2.921)                                           | -0.892<br>(0.705)                          | -3.334<br>(3.991)                            |
| Index adm in Nov 2016                            | -0.867<br>(0.694)                                         | -1.288<br>(2.848)                                           | -0.976<br>(0.697)                          | -2.544<br>(3.955)                            |
| Index adm in Dec 2016 <sup>4</sup>               | -0.792<br>(0.706)                                         | -3.394<br>(2.848)                                           | -0.943<br>(0.709)                          | -5.380<br>(3.854)                            |
| Previous myocardial<br>infarction                | 0.182*<br>(0.104)                                         | 1.856*<br>(1.105)                                           | 0.173<br>(0.111)                           | 2.044*<br>(1.198)                            |
| Cerebrovascular / peripheral<br>vascular disease | 0.226                                                     | 1.963                                                       | 0.249                                      | 1.646                                        |

|                                               |                     |                   |                     |                    |
|-----------------------------------------------|---------------------|-------------------|---------------------|--------------------|
|                                               | (0.160)             | (1.337)           | (0.163)             | (1.368)            |
| Diabetes                                      | 0.215**<br>(0.107)  | 1.455<br>(0.989)  | 0.221**<br>(0.112)  | 1.196<br>(1.122)   |
| Congestive heart failure                      | 0.118<br>(0.125)    | 1.552<br>(1.072)  | 0.0908<br>(0.128)   | 1.491<br>(1.135)   |
| Chronic pulmonary disease                     | 0.298**<br>(0.149)  | 1.848<br>(1.557)  | 0.285*<br>(0.155)   | 1.726<br>(1.591)   |
| Liver or renal failure                        | -0.0876<br>(0.134)  | 0.815<br>(1.421)  | -0.121<br>(0.137)   | 0.378<br>(1.478)   |
| Connective tissue disease                     | -0.0945<br>(0.210)  | -1.443<br>(2.320) | -0.139<br>(0.224)   | -1.861<br>(2.472)  |
| Other diseases <sup>5</sup>                   | 0.165<br>(0.133)    | 0.498<br>(0.910)  | 0.143<br>(0.139)    | 0.541<br>(0.990)   |
| No. of pre-index inpatient visits             | 0.192<br>(0.156)    | 0.296<br>(1.167)  | 0.220<br>(0.159)    | 0.246<br>(1.183)   |
| No. of pre-index inpatient days               | 0.00749<br>(0.0160) | 0.289<br>(0.271)  | 0.00378<br>(0.0165) | 0.283<br>(0.274)   |
| No. of pre-index outpatient specialist visits | -0.0287<br>(0.0190) | -0.128<br>(0.148) | -0.0254<br>(0.0192) | -0.0957<br>(0.152) |
| No. of pre-index emergency department visits  | -0.0401<br>(0.0900) | -0.490<br>(0.807) | -0.0620<br>(0.0930) | -0.514<br>(0.818)  |
| Observations                                  | 270                 | 270               | 270                 | 270                |
| R-squared                                     | 0.244               | 0.200             | 0.229               | 0.173              |

Notes:

<sup>1</sup> Heteroskedasticity-robust standard errors in parentheses. \*\*\* p<0.01, \*\* p<0.05, \* p<0.1

<sup>2</sup> Estimates of the effect of CareHub are from a regression model that includes controls for demographics, co-morbidities, and healthcare utilization in the 6 months before the index visit.

<sup>3</sup> For the outcome variables “total days readmitted” in columns (2) and (4), patients without any readmissions are assigned a value of 0. These outcome variables thus capture effects due to reduced readmissions as well as reduced length of stay for patients who are readmitted.

<sup>4</sup> Admission dates were shifted to mask confidential information. Therefore, our data includes admissions dated in December 2016, even though the last patient for our study was recruited in November 2016.

<sup>5</sup> Other diseases include AIDS, cancer, and dementia.

Table A2.3: Heterogeneity analyses by gender

| Independent variables                            | Outcome variables                                         |                                                             |                                            |                                              |
|--------------------------------------------------|-----------------------------------------------------------|-------------------------------------------------------------|--------------------------------------------|----------------------------------------------|
|                                                  | (1)<br>No. of<br>readmissions<br>(cardiac &<br>unplanned) | (2)<br>Total days<br>readmitted<br>(cardiac &<br>unplanned) | (3)<br>No. of<br>readmissions<br>(cardiac) | (4)<br>Total days<br>readmitted<br>(cardiac) |
| CareHub                                          | -0.231<br>(0.154)                                         | -1.056<br>(1.021)                                           | -0.226<br>(0.159)                          | -1.020<br>(1.233)                            |
| CareHub × female                                 | -0.00748<br>(0.246)                                       | -2.768<br>(3.186)                                           | 0.0698<br>(0.253)                          | -2.329<br>(3.332)                            |
| Male                                             | 0.148<br>(0.185)                                          | -2.015<br>(2.257)                                           | 0.165<br>(0.186)                           | -1.547<br>(2.321)                            |
| Age                                              | -0.00275<br>(0.0265)                                      | -0.135<br>(0.385)                                           | -0.00380<br>(0.0296)                       | -0.0563<br>(0.396)                           |
| Age-squared                                      | 4.54e-05<br>(0.000204)                                    | 0.00109<br>(0.00307)                                        | 3.80e-05<br>(0.000222)                     | 0.000397<br>(0.00315)                        |
| Ethnicity: Malay                                 | 0.0160<br>(0.149)                                         | -1.599<br>(1.402)                                           | 0.0461<br>(0.160)                          | -1.989<br>(1.452)                            |
| Ethnicity: Indian                                | 0.136<br>(0.258)                                          | -0.788<br>(1.262)                                           | 0.107<br>(0.258)                           | -0.351<br>(1.606)                            |
| Ethnicity: Others                                | 0.0686<br>(0.217)                                         | 1.625<br>(2.883)                                            | 0.0307<br>(0.223)                          | 1.206<br>(2.913)                             |
| Marital status: Married                          | 0.160<br>(0.240)                                          | 2.005<br>(1.283)                                            | 0.130<br>(0.258)                           | 2.212<br>(1.390)                             |
| Marital status: Missing value                    | 0.0521<br>(0.245)                                         | 1.649<br>(1.577)                                            | 0.000120<br>(0.266)                        | 2.084<br>(1.737)                             |
| Ward C                                           | 0.0719<br>(0.119)                                         | 0.527<br>(1.348)                                            | 0.0590<br>(0.129)                          | 0.0494<br>(1.466)                            |
| Index adm in Aug 2016                            | -0.818<br>(0.754)                                         | -2.075<br>(2.859)                                           | -0.985<br>(0.759)                          | -4.223<br>(3.869)                            |
| Index adm in Sep 2016                            | -0.920<br>(0.722)                                         | -3.479<br>(2.790)                                           | -1.039<br>(0.731)                          | -5.541<br>(3.860)                            |
| Index adm in Oct 2016                            | -0.765<br>(0.719)                                         | -1.767<br>(3.027)                                           | -0.882<br>(0.728)                          | -3.264<br>(4.071)                            |
| Index adm in Nov 2016                            | -0.870<br>(0.704)                                         | -1.535<br>(2.930)                                           | -0.972<br>(0.713)                          | -2.753<br>(4.047)                            |
| Index adm in Dec 2016 <sup>4</sup>               | -0.825<br>(0.724)                                         | -3.780<br>(3.006)                                           | -0.974<br>(0.733)                          | -5.721<br>(4.023)                            |
| Previous myocardial<br>infarction                | 0.174*<br>(0.105)                                         | 1.819*<br>(1.099)                                           | 0.164<br>(0.112)                           | 2.008*<br>(1.190)                            |
| Cerebrovascular / peripheral<br>vascular disease | 0.216                                                     | 1.892                                                       | 0.238                                      | 1.581                                        |



|                                               |          |         |          |         |
|-----------------------------------------------|----------|---------|----------|---------|
|                                               | (0.161)  | (1.308) | (0.164)  | (1.339) |
| Diabetes                                      | 0.201*   | 1.485   | 0.203*   | 1.214   |
|                                               | (0.105)  | (0.987) | (0.110)  | (1.115) |
| Congestive heart failure                      | 0.117    | 1.533   | 0.0897   | 1.475   |
|                                               | (0.126)  | (1.085) | (0.129)  | (1.146) |
| Chronic pulmonary disease                     | 0.317**  | 2.090   | 0.301*   | 1.939   |
|                                               | (0.157)  | (1.692) | (0.163)  | (1.734) |
| Liver or renal failure                        | -0.0758  | 1.036   | -0.113   | 0.570   |
|                                               | (0.140)  | (1.566) | (0.144)  | (1.616) |
| Connective tissue disease                     | -0.0726  | -1.352  | -0.114   | -1.773  |
|                                               | (0.213)  | (2.321) | (0.226)  | (2.474) |
| Other diseases <sup>5</sup>                   | 0.165    | 0.494   | 0.143    | 0.538   |
|                                               | (0.137)  | (0.929) | (0.143)  | (1.010) |
| No. of pre-index inpatient visits             | 0.206    | 0.643   | 0.227    | 0.545   |
|                                               | (0.157)  | (1.125) | (0.161)  | (1.144) |
| No. of pre-index inpatient days               | 0.00937  | 0.287   | 0.00619  | 0.283   |
|                                               | (0.0156) | (0.260) | (0.0163) | (0.264) |
| No. of pre-index outpatient specialist visits | -0.0264  | -0.122  | -0.0226  | -0.0902 |
|                                               | (0.0188) | (0.153) | (0.0192) | (0.157) |
| No. of pre-index emergency department visits  | -0.0592  | -0.803  | -0.0771  | -0.786  |
|                                               | (0.0929) | (0.936) | (0.0965) | (0.949) |
| Observations                                  | 270      | 270     | 270      | 270     |
| R-squared                                     | 0.229    | 0.203   | 0.211    | 0.174   |

Notes:

<sup>1</sup> Heteroskedasticity-robust standard errors in parentheses. \*\*\* p<0.01, \*\* p<0.05, \* p<0.1

<sup>2</sup> Estimates of the effect of CareHub are from a regression model that includes controls for demographics, co-morbidities, and healthcare utilization in the 6 months before the index visit.

<sup>3</sup> For the outcome variables “total days readmitted” in columns (2) and (4), patients without any readmissions are assigned a value of 0. These outcome variables thus capture effects due to reduced readmissions as well as reduced length of stay for patients who are readmitted.

<sup>4</sup> Admission dates were shifted to mask confidential information. Therefore, our data includes admissions dated in December 2016, even though the last patient for our study was recruited in November 2016.

<sup>5</sup> Other diseases include AIDS, cancer, and dementia.

Table A2.4: Heterogeneity analyses by age

| Independent variables                            | Outcome variables                                         |                                                             |                                            |                                              |
|--------------------------------------------------|-----------------------------------------------------------|-------------------------------------------------------------|--------------------------------------------|----------------------------------------------|
|                                                  | (1)<br>No. of<br>readmissions<br>(cardiac &<br>unplanned) | (2)<br>Total days<br>readmitted<br>(cardiac &<br>unplanned) | (3)<br>No. of<br>readmissions<br>(cardiac) | (4)<br>Total days<br>readmitted<br>(cardiac) |
| CareHub                                          | -0.796<br>(0.586)                                         | 0.151<br>(4.532)                                            | -0.703<br>(0.650)                          | 0.431<br>(5.030)                             |
| CareHub × age                                    | 0.00812<br>(0.00813)                                      | -0.0346<br>(0.0705)                                         | 0.00731<br>(0.00892)                       | -0.0354<br>(0.0757)                          |
| Male                                             | 0.157<br>(0.120)                                          | -0.563<br>(1.082)                                           | 0.133<br>(0.124)                           | -0.329<br>(1.125)                            |
| Age                                              | -0.00740<br>(0.0272)                                      | -0.107<br>(0.363)                                           | -0.00821<br>(0.0297)                       | -0.0293<br>(0.372)                           |
| Age-squared                                      | 4.85e-05<br>(0.000210)                                    | 0.000972<br>(0.00308)                                       | 4.35e-05<br>(0.000227)                     | 0.000298<br>(0.00315)                        |
| Ethnicity: Malay                                 | 0.0150<br>(0.148)                                         | -1.608<br>(1.419)                                           | 0.0455<br>(0.159)                          | -1.995<br>(1.464)                            |
| Ethnicity: Indian                                | 0.145<br>(0.261)                                          | -0.901<br>(1.296)                                           | 0.117<br>(0.262)                           | -0.453<br>(1.646)                            |
| Ethnicity: Others                                | 0.0531<br>(0.220)                                         | 1.726<br>(2.924)                                            | 0.0158<br>(0.224)                          | 1.303<br>(2.952)                             |
| Marital status: Married                          | 0.158<br>(0.238)                                          | 2.350*<br>(1.343)                                           | 0.119<br>(0.259)                           | 2.503*<br>(1.455)                            |
| Marital status: Missing value                    | 0.0603<br>(0.245)                                         | 1.820<br>(1.584)                                            | 0.00191<br>(0.271)                         | 2.222<br>(1.738)                             |
| Ward C                                           | 0.0725<br>(0.120)                                         | 0.324<br>(1.265)                                            | 0.0650<br>(0.128)                          | -0.122<br>(1.374)                            |
| Index adm in Aug 2016                            | -0.813<br>(0.743)                                         | -2.245<br>(2.819)                                           | -0.976<br>(0.750)                          | -4.370<br>(3.870)                            |
| Index adm in Sep 2016                            | -0.918<br>(0.718)                                         | -3.464<br>(2.757)                                           | -1.038<br>(0.728)                          | -5.529<br>(3.856)                            |
| Index adm in Oct 2016                            | -0.769<br>(0.715)                                         | -1.796<br>(2.991)                                           | -0.884<br>(0.725)                          | -3.285<br>(4.066)                            |
| Index adm in Nov 2016                            | -0.864<br>(0.703)                                         | -1.317<br>(2.896)                                           | -0.974<br>(0.714)                          | -2.573<br>(4.020)                            |
| Index adm in Dec 2016 <sup>4</sup>               | -0.813<br>(0.721)                                         | -3.556<br>(2.933)                                           | -0.970<br>(0.732)                          | -5.541<br>(3.971)                            |
| Previous myocardial<br>infarction                | 0.170<br>(0.105)                                          | 1.842<br>(1.116)                                            | 0.160<br>(0.112)                           | 2.030*<br>(1.204)                            |
| Cerebrovascular / peripheral<br>vascular disease | 0.234                                                     | 1.847                                                       | 0.254                                      | 1.528                                        |

|                                               |          |         |          |         |
|-----------------------------------------------|----------|---------|----------|---------|
|                                               | (0.166)  | (1.320) | (0.169)  | (1.351) |
| Diabetes                                      | 0.207*   | 1.382   | 0.210*   | 1.123   |
|                                               | (0.108)  | (0.973) | (0.114)  | (1.097) |
| Congestive heart failure                      | 0.123    | 1.520   | 0.0952   | 1.458   |
|                                               | (0.124)  | (1.067) | (0.128)  | (1.132) |
| Chronic pulmonary disease                     | 0.311**  | 1.934   | 0.301*   | 1.812   |
|                                               | (0.152)  | (1.555) | (0.160)  | (1.592) |
| Liver or renal failure                        | -0.0753  | 0.850   | -0.107   | 0.413   |
|                                               | (0.132)  | (1.411) | (0.136)  | (1.467) |
| Connective tissue disease                     | -0.0718  | -1.371  | -0.113   | -1.790  |
|                                               | (0.214)  | (2.331) | (0.227)  | (2.483) |
| Other diseases <sup>5</sup>                   | 0.163    | 0.507   | 0.141    | 0.551   |
|                                               | (0.135)  | (0.925) | (0.142)  | (1.009) |
| No. of pre-index inpatient visits             | 0.193    | 0.389   | 0.224    | 0.340   |
|                                               | (0.157)  | (1.180) | (0.162)  | (1.198) |
| No. of pre-index inpatient days               | 0.00916  | 0.296   | 0.00577  | 0.291   |
|                                               | (0.0159) | (0.270) | (0.0165) | (0.274) |
| No. of pre-index outpatient specialist visits | -0.0246  | -0.127  | -0.0210  | -0.0953 |
|                                               | (0.0184) | (0.152) | (0.0188) | (0.156) |
| No. of pre-index emergency department visits  | -0.0491  | -0.595  | -0.0748  | -0.619  |
|                                               | (0.0902) | (0.805) | (0.0949) | (0.816) |
| Observations                                  | 270      | 270     | 270      | 270     |
| R-squared                                     | 0.232    | 0.199   | 0.212    | 0.172   |

Notes:

<sup>1</sup> Heteroskedasticity-robust standard errors in parentheses. \*\*\* p<0.01, \*\* p<0.05, \* p<0.1

<sup>2</sup> Estimates of the effect of CareHub are from a regression model that includes controls for demographics, co-morbidities, and healthcare utilization in the 6 months before the index visit.

<sup>3</sup> For the outcome variables “total days readmitted” in columns (2) and (4), patients without any readmissions are assigned a value of 0. These outcome variables thus capture effects due to reduced readmissions as well as reduced length of stay for patients who are readmitted.

<sup>4</sup> Admission dates were shifted to mask confidential information. Therefore, our data includes admissions dated in December 2016, even though the last patient for our study was recruited in November 2016.

<sup>5</sup> Other diseases include AIDS, cancer, and dementia.
